# Supplementary material for: Effect of Acupuncture on Movement Function in Patients with Parkinson’s Disease: Network Meta-Analysis of Randomized Controlled Trials
Source: MDPI journal article supplement (doi:10.3390/healthcare9111502), 2021-11-05

## Supplemental Digital Contents 4. Forest plot of pairwise meta-analysis (UPDRS III and UPDRS II)

### 4.1 Acupuncture + Conventional drug therapy vs Conventional drug therapy, UPDRSIII score

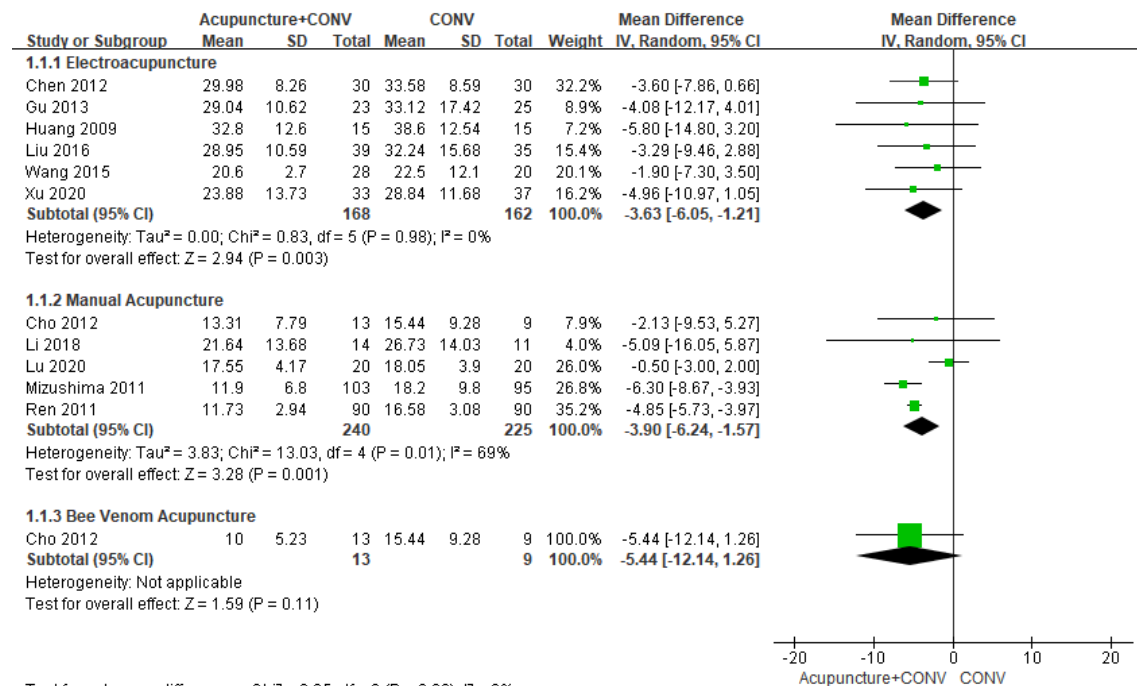

### 4.2 Acupuncture + Conventional drug therapy vs Sham Acupuncture + Conventional drug therapy, UPDRSIII score

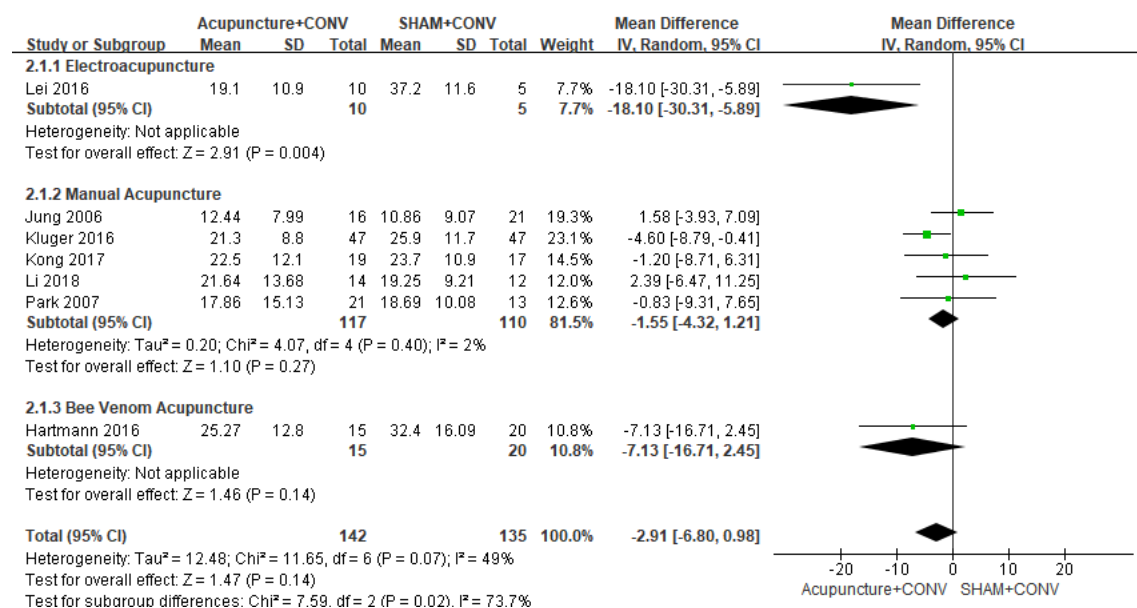

#### 4.3 Acupuncture + Conventional drug therapy vs Conventional drug therapy, UPDRSII score

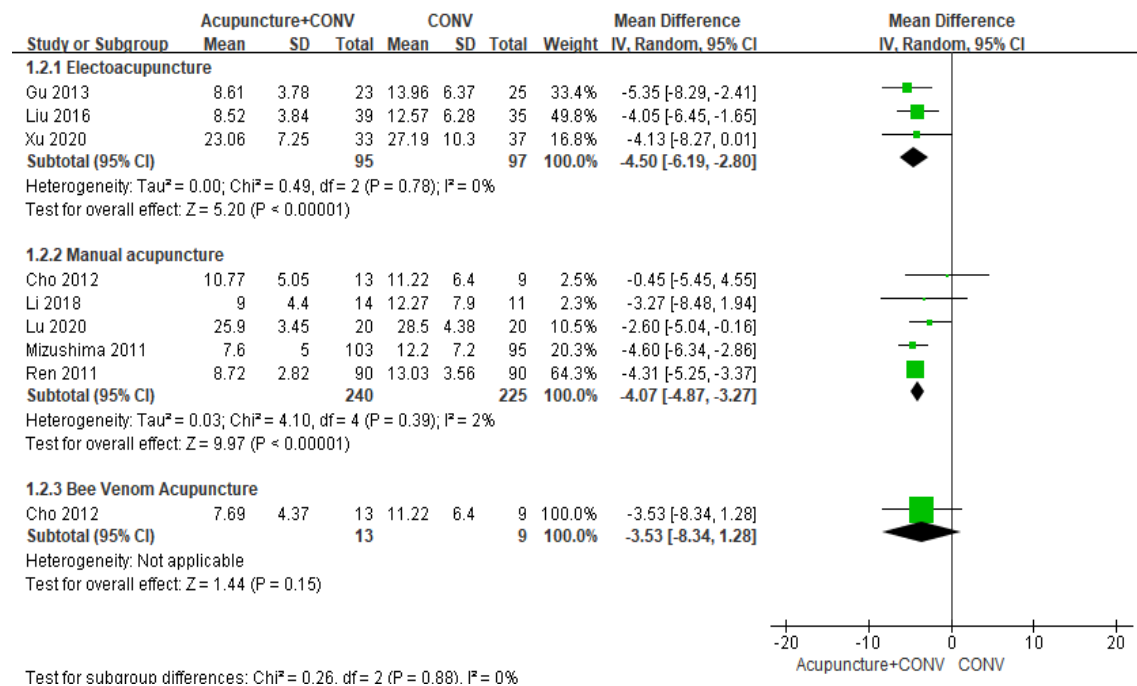

#### 4.4 Acupuncture + Conventional drug therapy vs Sham Acupuncture + Conventional drug therapy, UPDRSII score

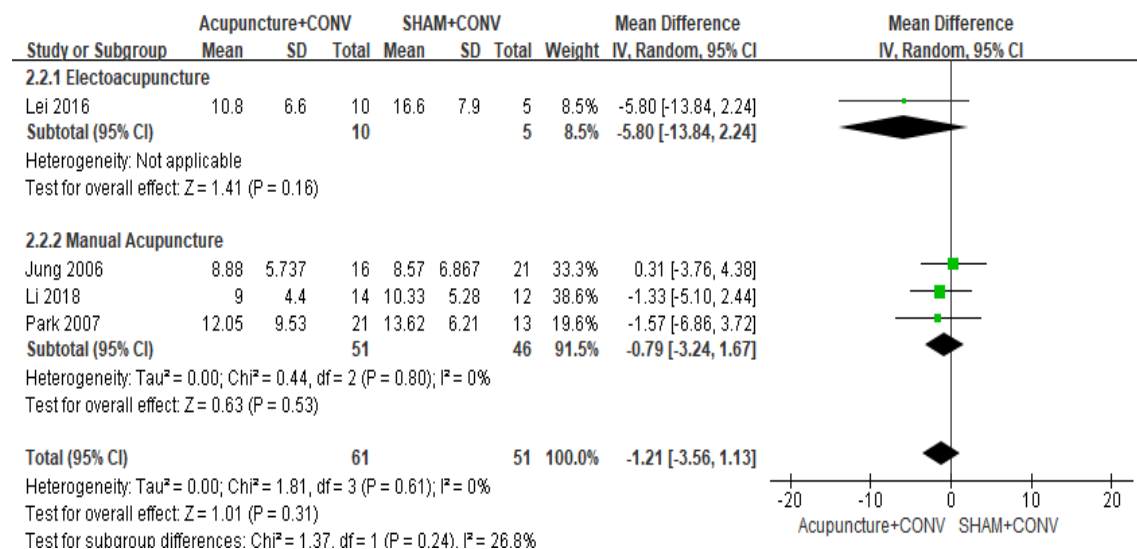

Supplement: s1 [file s1]
