# Supplementary material for: Effect of Acupuncture on Movement Function in Patients with Parkinson’s Disease: Network Meta-Analysis of Randomized Controlled Trials
Source: MDPI journal article supplement (doi:10.3390/healthcare9111502), 2021-11-05
Supplement: s1 [file s1]

**Supplemental Digital Contents 2. Articles excluded after full-text reviewing with reasons**

| <b>Study</b>                  | <b>Reason</b>                    |
|-------------------------------|----------------------------------|
| Aroxa 2017 <sup>1</sup>       | UPDRS is not used                |
| Chae 2009 <sup>2</sup>        | Multiple intervention            |
| Chen 2015 <sup>3</sup>        | Not RCT                          |
| Cho 2018 <sup>4</sup>         | Multiple intervention            |
| Cristian 2005 <sup>5</sup>    | UPDRS is not used                |
| Doo 2015 <sup>6</sup>         | Not RCT                          |
| Eng 2006 <sup>7</sup>         | Not RCT                          |
| Fukuda 2016 <sup>8</sup>      | Not RCT                          |
| Huang 2009 <sup>9</sup>       | UPDRS is not used                |
| Huang 2010 <sup>10</sup>      | UPDRS is not used                |
| Jang 2020 <sup>11</sup>       | MDS UPDRS                        |
| Ren 2008 <sup>12</sup>        | Not RCT                          |
| Shulman 2002 <sup>13</sup>    | Inappropriate experimental group |
| Toosizadeh 2015 <sup>14</sup> | Duplication                      |
| Wang 2002 <sup>15</sup>       | UPDRS is not used                |
| Yeo 2014 <sup>16</sup>        | Not RCT                          |
| Yeo 2012 <sup>17</sup>        | Not RCT                          |
| Yeo 2018 <sup>18</sup>        | Not RCT                          |

|                           |                                                                                      |
|---------------------------|--------------------------------------------------------------------------------------|
| Yu 2019 <sup>19</sup>     | Not RCT                                                                              |
| Zhuang 2000 <sup>20</sup> | Not RCT                                                                              |
| Jiang 2006 <sup>21</sup>  | No UPDRSIII results                                                                  |
| Zhuo 2016 <sup>22</sup>   | UPDRSII,III scores are marked as a sum                                               |
| Luo 2019 <sup>23</sup>    | No reports on basic treatment for Parkinson's disease.<br>(Phenolphthalein was used) |
| Lin 2018 <sup>24</sup>    | The basic treatment for Parkinson's disease is not specified exactly.                |
| Zhang 2020 <sup>25</sup>  | UPDRS scores are marked as a sum                                                     |
| Zhang 2013 <sup>26</sup>  | Multiple intervention. Gastrodin was used in both groups.                            |
| Feng 2011 <sup>27</sup>   | Duplication                                                                          |
| LIU 2015 <sup>28</sup>    | No UPDRSIII results                                                                  |

## Appendix 16 Reference

1. Aroxa FH de A, Gondim ITG de O, Santos ELW, Coriolano M das GW de S, Asano AGC, Asano NMJ. Acupuncture as Adjuvant Therapy for Sleep Disorders in Parkinson's Disease. *J Acupunct Meridian Stud*. 2017;10(1):33-38.
2. Chae Y, Lee H, Kim H, et al. Parsing brain activity associated with acupuncture treatment in Parkinson's diseases. *Mov Disord*. 2009;24(12):1794-1802.
3. Chen F-P, Chang C-M, Shiu J-H, et al. A clinical study of integrating acupuncture and Western medicine in treating patients with Parkinson's disease. *Am J Chin Med*. 2015;43(3):407-423.
4. Cho S-Y, Lee Y-E, Doo K-H, et al. Efficacy of Combined Treatment with Acupuncture and Bee Venom Acupuncture as an Adjunctive Treatment for Parkinson's Disease. *J Altern Complement Med*. 2018;24(1):25-32.
5. Cristian A, Katz M, Cutrone E, Walker RH. Evaluation of acupuncture in the treatment of Parkinson's disease: a double-blind pilot study. *Mov Disord*. 2005;20(9):1185-1188.
6. Doo K-H, Lee J-H, Cho S-Y, et al. A Prospective Open-Label Study of Combined Treatment for Idiopathic Parkinson's Disease Using Acupuncture and Bee Venom Acupuncture as an Adjunctive Treatment. *J Altern Complement Med*. 2015;21(10):598-603.
7. Eng ML, Lyons KE, Greene MS, Pahwa R. Open-label trial regarding the use of acupuncture and yin tui na in Parkinson's disease outpatients: a pilot study on efficacy, tolerability, and quality of life. *J Altern Complement Med*. 2006;12(4):395-399.

8. Fukuda S, Kuriyama N, Tsuru H, Egawa M. Immediate effects of acupuncture on tongue pressure including swallowing reflex latency in Parkinson's disease. *Acupunct Med.* 2016;34(1):59-61.
9. Huang Y, Jiang X, Zhuo Y, Tang A, Wik G. Complementary acupuncture treatment increases cerebral metabolism in patients with Parkinson's disease. *Int J Neurosci.* 2009;119(8):1190-1197.
10. Huang Y, Jiang X, Zhuo Y, Wik G. Complementary acupuncture in Parkinson's disease: a spect study. *Int J Neurosci.* 2010;120(2):150-154.
11. Jang J-H, Park S, An J, et al. Gait Disturbance Improvement and Cerebral Cortex Rearrangement by Acupuncture in Parkinson's Disease: A Pilot Assessor-Blinded, Randomized, Controlled, Parallel-Group Trial. *Neurorehabil Neural Repair.* 2020;34(12):1111-1123.
12. Ren X. Fifty cases of Parkinson's disease treated by acupuncture combined with madopar. *J Tradit Chin Med.* 2008;28(4):255-257.
13. Shulman LM, Wen X, Weiner WJ, et al. Acupuncture therapy for the symptoms of Parkinson's disease. *Mov Disord.* 2002;17(4):799-802.
14. Toosizadeh N, Lei H, Schwenk M, et al. Does integrative medicine enhance balance in aging adults? Proof of concept for the benefit of electroacupuncture therapy in Parkinson's disease. *Gerontology.* 2015;61(1):3-14.
15. Wang L, He C, Liu Y, Zhu L. Effect of acupuncture on the auditory evoked brain stem potential in Parkinson's disease. *J Tradit Chin Med.* 2002;22(1):15-17.
16. Yeo S, Choe I-H, van den Noort M, et al. Acupuncture on GB34 activates the

precentral gyrus and prefrontal cortex in Parkinson's disease. BMC Complement Altern Med. 2014;14:336.

17. Yeo S, Lim S, Choe I-H, et al. Acupuncture stimulation on GB34 activates neural responses associated with Parkinson's disease. CNS Neurosci Ther. 2012;18(9):781-790.

18. Yeo S, van den Noort M, Bosch P, Lim S. A study of the effects of 8-week acupuncture treatment on patients with Parkinson's disease. Medicine (Baltimore). 2018;97(50):e13434.

19. Yu S-W, Lin S-H, Tsai C-C, et al. Acupuncture Effect and Mechanism for Treating Pain in Patients With Parkinson's Disease. Front Neurol. 2019;10:1114.

20. Zhuang X, Wang L. Acupuncture treatment of Parkinson's disease--a report of 29 cases. J Tradit Chin Med. 2000;20(4):265-267.

21. Jiang X, Huang Y, Zhuo Y, Gao Y. [Therapeutic effect of scalp electroacupuncture on Parkinson disease]. Nan Fang Yi Ke Da Xue Xue Bao. 2006;26(1):114-116.

22. 周琛, 庞伟, 吴岚. 针灸联合美多芭治疗帕金森病的临床效果和安全性分析. 中国医药科学. 2016;6(22):11-13+18.

23. 罗思宁, 张艳. 电针足三里联合常规西药治疗帕金森伴便秘的临床效果. 临床医学研究与实践. 2019;4(27):136-138.

24. 林铎, 赖新生, 庄子齐, 杨楠. 针刺四关穴治疗帕金森病剂末现象的临床观察. 浙江中医药大学学报. 2018;42(02):157-159.

25. 张燕平, 刘钢敏, 李燕梅. 针刺配合盐酸普拉克索对帕金森病伴抑郁疗效观察. 北京中医药. 2020;39(06):594-597.

26. 张小莉, 冯为菊, 陈义良, 罗阳, 王红磊. 针药并用治疗帕金森病合并轻度认知损害疗效观察. 上海针灸杂志. 2013;32(04):263-265.
27. 冯为菊, 陈义良, 张小莉. 针刺联合小剂量托特罗定治疗帕金森病合并膀胱过度活动症. 中国实用神经疾病杂志. 2011;14(16):7-10.
28. 刘承浩, 王睿, 金亚蓓, 孙占玲, 周翔, 何嘉莹. 葛根素穴位注射治疗早中期帕金森病: 多中心随机对照试验. 针刺研究. 2015;40(01):56-60.
