# Supplementary material for: Effect of Acupuncture on Movement Function in Patients with Parkinson’s Disease: Network Meta-Analysis of Randomized Controlled Trials
Source: MDPI journal article supplement (doi:10.3390/healthcare9111502), 2021-11-05
Supplement: s1 [file s1]

## Supplementary Digital Contents1. Search strategies used in each Database

### 1A. Search strategies used in MEDLINE via PubMed

|    | Searches                                                                                                                                                                                                                                                                                                                                               | Results |
|----|--------------------------------------------------------------------------------------------------------------------------------------------------------------------------------------------------------------------------------------------------------------------------------------------------------------------------------------------------------|---------|
| #1 | "parkinson disease"[Mesh]                                                                                                                                                                                                                                                                                                                              | 68,299  |
| #2 | parkinson disease OR Idiopathic Parkinson's Disease OR Lewy Body Parkinson's Disease OR Parkinson's Disease, Idiopathic OR Parkinson's Disease, Lewy Body OR Parkinson Disease, Idiopathic OR Parkinson's Disease OR Idiopathic Parkinson Disease OR Lewy Body Parkinson Disease OR Primary Parkinsonism OR Parkinsonism, Primary OR Paralysis Agitans | 119,065 |
| #3 | "acupuncture" [Mesh]                                                                                                                                                                                                                                                                                                                                   | 1,717   |
| #4 | Acupuncture OR Pharmacopuncture OR Acupuncture Treatment OR Acupuncture Treatments OR Treatment, Acupuncture OR Therapy, Acupuncture OR Pharmacopuncture Treatment OR Treatment, Pharmacopuncture OR Pharmacopuncture Therapy OR Therapy, Pharmacopuncture OR Acupotomy OR Acupotomies                                                                 | 34,516  |
| #5 | Electroacupuncture                                                                                                                                                                                                                                                                                                                                     | 6,014   |
| #6 | Bee Venoms OR Venoms, Bee OR Bee Venom OR Venom, Bee OR Apis Venoms OR Venoms, Apis OR Apitoxin OR Honeybee Venoms OR Venoms, Honeybee OR Honeybee Venom OR Venom, Honeybee                                                                                                                                                                            | 6,832   |
| #7 | Fire needle therapy OR Fire acupuncture                                                                                                                                                                                                                                                                                                                | 231     |
| #8 | (#1 OR #2) AND (#3 OR #4 OR #5 OR #6 OR #7)                                                                                                                                                                                                                                                                                                            | 345     |

### 1B Search strategies used in EMBASE

|    | Searches                                                                                                                                                                                                         | Results |
|----|------------------------------------------------------------------------------------------------------------------------------------------------------------------------------------------------------------------|---------|
| #1 | 'parkinson disease'/exp                                                                                                                                                                                          | 164,234 |
| #2 | 'Parkinson disease' OR 'Parkinson Disease, Lewy Body' OR 'Parkinson Disease, Idiopathic' OR 'Idiopathic Parkinson Disease' OR 'Lewy Body Parkinson Disease' OR 'Primary Parkinsonism' OR 'Parkinsonism, Primary' | 167,444 |

|    |                                                                                                                                                                                                                                                                                                                |        |
|----|----------------------------------------------------------------------------------------------------------------------------------------------------------------------------------------------------------------------------------------------------------------------------------------------------------------|--------|
|    | OR 'Paralysis Agitans'                                                                                                                                                                                                                                                                                         |        |
| #3 | 'acupuncture'/exp                                                                                                                                                                                                                                                                                              | 48,475 |
| #4 | 'Acupuncture' OR 'Pharmacopuncture' OR 'Acupuncture Treatment' OR 'Acupuncture Treatments' OR 'Treatment, Acupuncture' OR 'Therapy, Acupuncture' OR 'Pharmacopuncture Treatment' OR 'Treatment, Pharmacopuncture' OR 'Pharmacopuncture Therapy' OR 'Therapy, Pharmacopuncture' OR 'Acupotomy' OR 'Acupotomies' | 53,475 |
| #5 | Electroacupuncture                                                                                                                                                                                                                                                                                             | 8,283  |
| #6 | 'Bee Venoms' OR 'Venoms, Bee' OR 'Bee Venom' OR 'Venom, Bee' OR 'Apis Venoms' OR 'Venoms, Apis' OR 'Apitoxin' OR 'Honeybee Venoms' OR 'Venoms, Honeybee' OR 'Honeybee Venom' OR 'Venom, Honeybee'                                                                                                              | 4,673  |
| #7 | 'Fire needle therapy' OR 'Fire acupuncture'                                                                                                                                                                                                                                                                    | 47     |
| #8 | (#1 OR #2) AND (#3 OR #4 OR #5 OR #6 OR #7)                                                                                                                                                                                                                                                                    | 538    |

### 1C Search strategies used in Cochrane

|    | Searches                                                                                                                                                                                                                                                                                                                                               | Results |
|----|--------------------------------------------------------------------------------------------------------------------------------------------------------------------------------------------------------------------------------------------------------------------------------------------------------------------------------------------------------|---------|
| #1 | MeSH descriptor: [parkinson disease] explode all trees                                                                                                                                                                                                                                                                                                 | 4,233   |
| #2 | parkinson disease OR Idiopathic Parkinson's Disease OR Lewy Body Parkinson's Disease OR Parkinson's Disease, Idiopathic OR Parkinson's Disease, Lewy Body OR Parkinson Disease, Idiopathic OR Parkinson's Disease OR Idiopathic Parkinson Disease OR Lewy Body Parkinson Disease OR Primary Parkinsonism OR Parkinsonism, Primary OR Paralysis Agitans | 10,683  |
| #3 | MeSH descriptor: [acupuncture] explode all trees                                                                                                                                                                                                                                                                                                       | 151     |
| #4 | Acupuncture OR Pharmacopuncture OR Acupuncture Treatment OR Acupuncture Treatments OR Treatment, Acupuncture OR Therapy, Acupuncture OR Pharmacopuncture Treatment OR Treatment, Pharmacopuncture OR Pharmacopuncture Therapy OR Therapy, Pharmacopuncture OR Acupotomy OR Acupotomies                                                                 | 16,921  |
| #5 | Electroacupuncture                                                                                                                                                                                                                                                                                                                                     | 2,670   |

|    |                                                                                                                                                                             |     |
|----|-----------------------------------------------------------------------------------------------------------------------------------------------------------------------------|-----|
| #6 | Bee Venoms OR Venoms, Bee OR Bee Venom OR Venom, Bee OR Apis Venoms OR Venoms, Apis OR Apitoxin OR Honeybee Venoms OR Venoms, Honeybee OR Honeybee Venom OR Venom, Honeybee | 155 |
| #7 | Fire needle therapy OR Fire acupuncture                                                                                                                                     | 190 |
| #8 | (#1 OR #2) AND (#3 OR #4 OR #5 OR #6 OR #7) in Trials                                                                                                                       | 115 |

### 1D Search strategies used in CNKI

|    | Searches                         | Results |
|----|----------------------------------|---------|
| #1 | Parkinson AND Acupuncture        | 663     |
| #2 | Parkinson AND Pharmacopuncture   | 9       |
| #3 | Parkinson AND Electroacupuncture | 245     |
| #4 | Parkinson AND Bee venom          | 57      |
| #5 | Parkinson AND Fire acupuncture   | 11      |
| #6 | #1 OR #2 OR #3 OR #4 OR #5       | 755     |

### 1E Search strategies used in OASIS

|    | Searches                                                    | Results |
|----|-------------------------------------------------------------|---------|
| #1 | Parkinson AND Acupuncture(Title, Abstract, Keywords)        | 120     |
| #2 | Parkinson AND Pharmacopuncture(Title, Abstract, Keywords)   | 12      |
| #3 | Parkinson AND Electroacupuncture(Title, Abstract, Keywords) | 6       |
| #4 | Parkinson AND Bee venom(Title, Abstract, Keywords)          | 9       |
| #5 | Parkinson AND Fire acupuncture(Title, Abstract, Keywords)   | 0       |
| #6 | #1 OR #2 OR #3 OR #4 OR #5                                  | 78      |

### 1F Search strategies used in RISS

|    | Searches                         | Results |
|----|----------------------------------|---------|
| #1 | Parkinson AND Acupuncture        | 98      |
| #2 | Parkinson AND Pharmacopuncture   | 20      |
| #3 | Parkinson AND Electroacupuncture | 7       |
| #4 | Parkinson AND Bee venom          | 22      |
| #5 | Parkinson AND Fire acupuncture   | 0       |
| #6 | #1 OR #2 OR #3 OR #4 OR #5       | 105     |

### 1G Search strategies used in KCI

|    | Searches                         | Results |
|----|----------------------------------|---------|
| #1 | Parkinson AND Acupuncture        | 85      |
| #2 | Parkinson AND Pharmacopuncture   | 17      |
| #3 | Parkinson AND Electroacupuncture | 5       |
| #4 | Parkinson AND Bee venom          | 17      |
| #5 | Parkinson AND Fire acupuncture   | 1       |
| #6 | #1 OR #2 OR #3 OR #4 OR #5       | 107     |

### 1H Search strategies used in NDSL

|    | Searches                         | Results |
|----|----------------------------------|---------|
| #1 | Parkinson AND Acupuncture        | 85      |
| #2 | Parkinson AND Pharmacopuncture   | 8       |
| #3 | Parkinson AND Electroacupuncture | 5       |
| #4 | Parkinson AND Bee venom          | 19      |
| #5 | Parkinson AND Fire acupuncture   | 1       |
| #6 | #1 OR #2 OR #3 OR #4 OR #5       | 88      |
