# Supplementary material for: Effect of Acupuncture on Movement Function in Patients with Parkinson’s Disease: Network Meta-Analysis of Randomized Controlled Trials
Source: MDPI journal article supplement (doi:10.3390/healthcare9111502), 2021-11-05
Supplement: s1 [file s1]

### Supplemental Digital Contents 3. Risk of bias graph

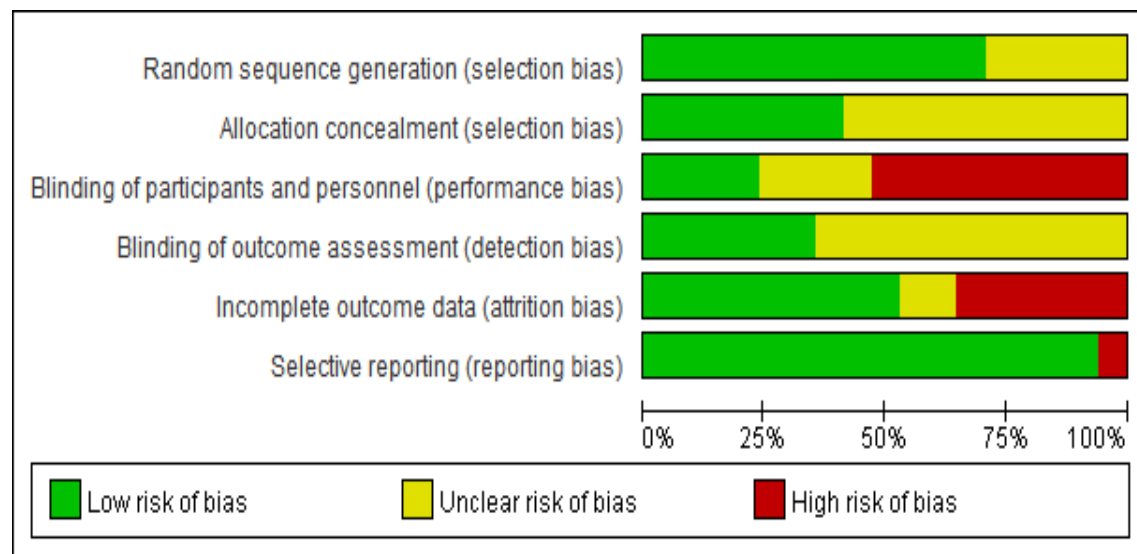

|                | Random sequence generation (selection bias) | Allocation concealment (selection bias) | Blinding of participants and personnel (performance bias) | Blinding of outcome assessment (detection bias) | Incomplete outcome data (attrition bias) | Selective reporting (reporting bias) |
|----------------|---------------------------------------------|-----------------------------------------|-----------------------------------------------------------|-------------------------------------------------|------------------------------------------|--------------------------------------|
| Chen 2012      | +                                           | ?                                       | -                                                         | ?                                               | +                                        | +                                    |
| Cho 2012       | +                                           | +                                       | -                                                         | +                                               | -                                        | +                                    |
| Gu 2013        | ?                                           | ?                                       | -                                                         | ?                                               | +                                        | +                                    |
| Hartmann 2016  | +                                           | +                                       | +                                                         | ?                                               | -                                        | +                                    |
| Huang 2009     | ?                                           | ?                                       | -                                                         | ?                                               | +                                        | +                                    |
| Jung 2006      | +                                           | ?                                       | +                                                         | ?                                               | ?                                        | +                                    |
| Kluger 2016    | +                                           | +                                       | -                                                         | ?                                               | +                                        | +                                    |
| Kong 2017      | +                                           | +                                       | +                                                         | +                                               | -                                        | +                                    |
| Lei 2016       | ?                                           | ?                                       | ?                                                         | +                                               | -                                        | -                                    |
| Li 2018        | +                                           | +                                       | -                                                         | +                                               | -                                        | +                                    |
| Liu 2016       | ?                                           | ?                                       | -                                                         | ?                                               | +                                        | +                                    |
| Lu 2020        | +                                           | ?                                       | -                                                         | ?                                               | +                                        | +                                    |
| Mizushima 2011 | +                                           | ?                                       | ?                                                         | ?                                               | ?                                        | +                                    |
| Park 2007      | +                                           | ?                                       | +                                                         | ?                                               | -                                        | +                                    |
| Ren 2011       | +                                           | +                                       | ?                                                         | ?                                               | +                                        | +                                    |
| Wang 2015      | ?                                           | ?                                       | ?                                                         | +                                               | +                                        | +                                    |
| Xu 2020        | +                                           | +                                       | -                                                         | +                                               | +                                        | +                                    |
