# Supplementary material for: Effect of Acupuncture on Movement Function in Patients with Parkinson’s Disease: Network Meta-Analysis of Randomized Controlled Trials
Source: MDPI journal article supplement (doi:10.3390/healthcare9111502), 2021-11-05
Supplement: s1 [file s1]

## Supplemental Digital Contents. 6 Sensitivity analysis

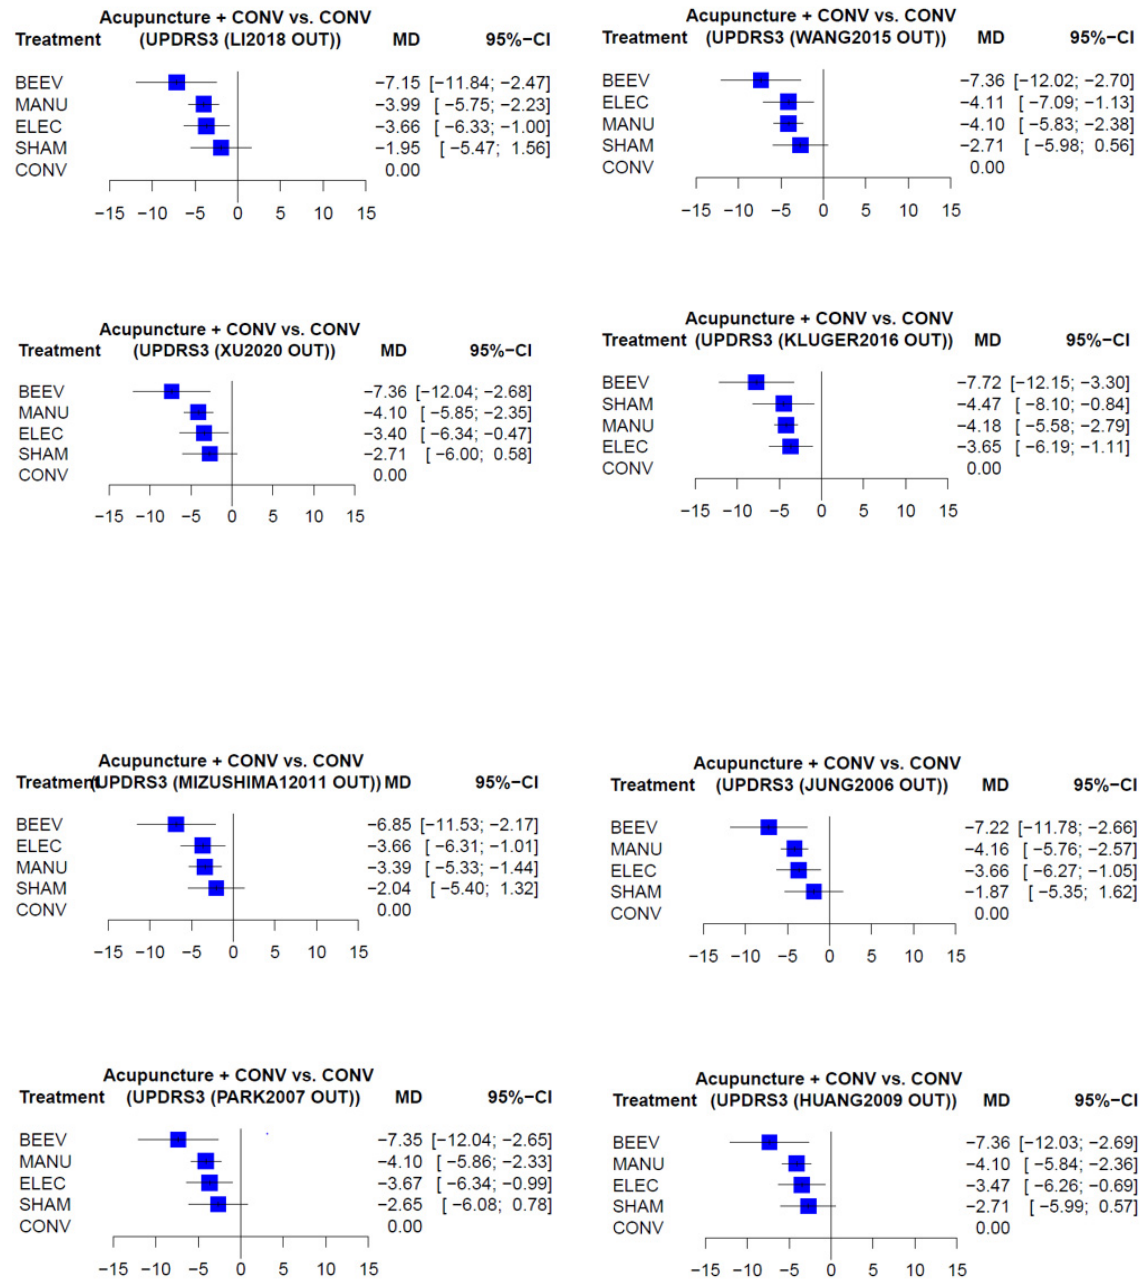

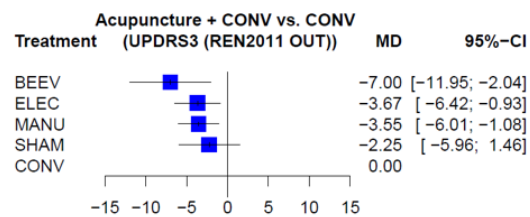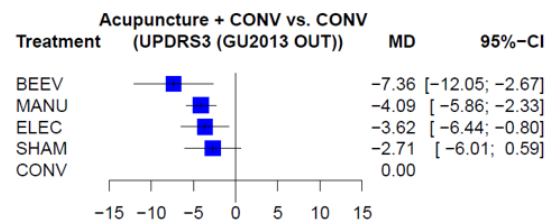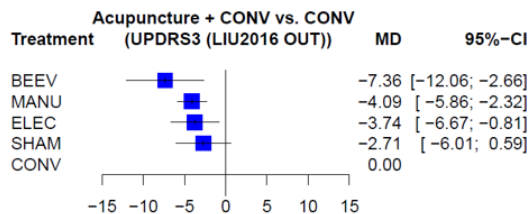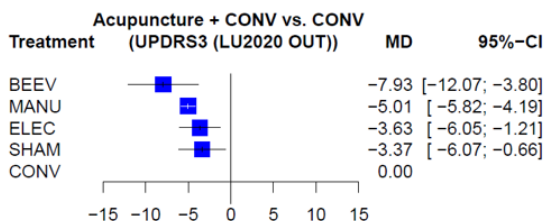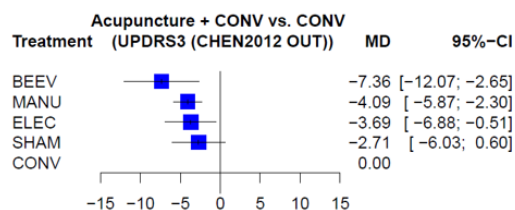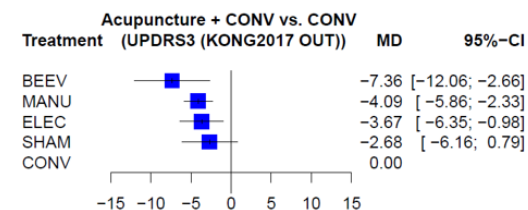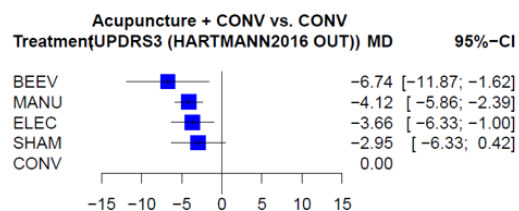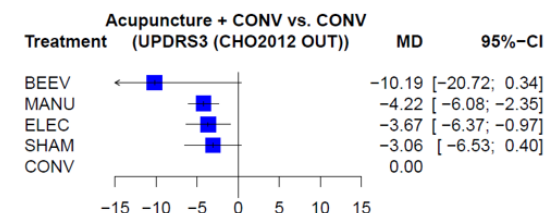

MD, Mean difference; CI, Confidence interval.

BEEV, Bee venom acupuncture+Conventional drug therapy; ELEC, Electroacupuncture+ Conventional drug therapy; SHAM, Sham acupuncture+Conventional drug therapy; CONV, Single conventional drug therapy; MANU, Manual acupuncture+Conventional drug therapy.
