# Supplementary material for: Effect of Acupuncture on Movement Function in Patients with Parkinson’s Disease: Network Meta-Analysis of Randomized Controlled Trials
Source: Healthcare (Basel). 2021 Nov 5;9(11):1502. doi: 10.3390/healthcare9111502 (PMC8619200; doi:10.3390/healthcare9111502)
Supplement: Supplementary file 1 [file healthcare-09-01502-s001.zip]

Archive with 7 entries (7 files):
- Supplement Digital Content 1_Search strategy.pdf
- Supplement Digital Content 2_Excluded study.pdf
- Supplement Digital Content 3_ROB.pdf
- Supplement Digital Content 4_Forest Plot PMA.pdf
- Supplement Digital Content 5_Net split graph.pdf
- Supplement Digital Content 6_Sensitivity anal.pdf
- Supplement Digital Content 7_UPDRS2.pdf
