# Supplementary figures and images for: Effect of Acupuncture on Movement Function in Patients with Parkinson’s Disease: Network Meta-Analysis of Randomized Controlled Trials
Source: MDPI journal article supplement (doi:10.3390/healthcare9111502), 2021-11-05

# Supplemental Digital Content 5 Net-split plot: UPDRS III score

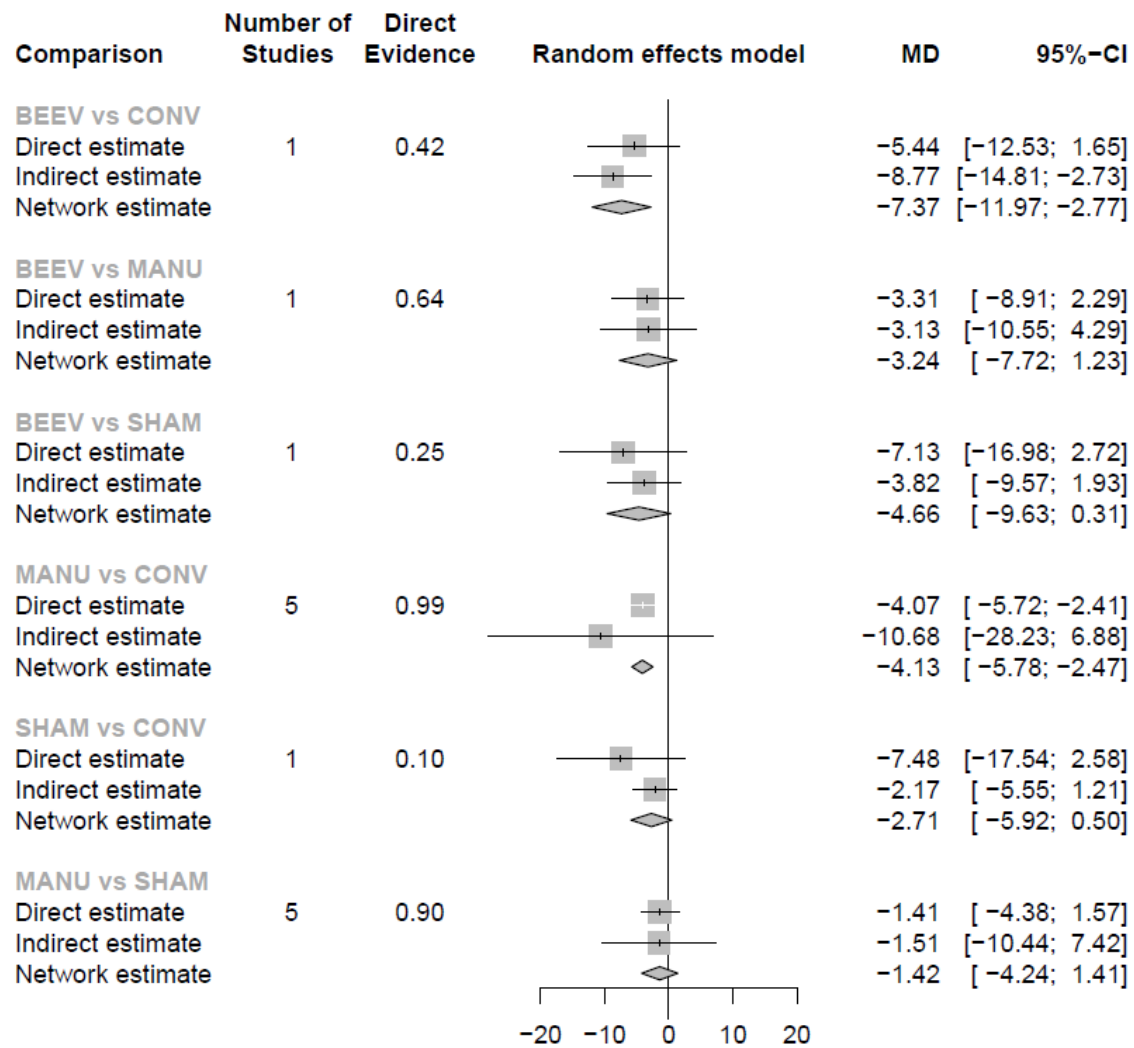

Supplement: s1 [file s1]
